# Supplementary material for: Core/shell TiO2–MnO2/MnO2heterostructure anodes for high-performance lithium-ion batteries
Source: Royal Society of Chemistry journal article supplement (doi:10.1039/c4ra06981a), 2014-08-20
Supplement: c4ra06981a1.pdf [file c4ra06981a1.pdf]

Supporting Information

## Core/shell $\text{TiO}_2\text{-MnO}_2/\text{MnO}_2$ heterostructure anodes for high-performance lithium-ion batteries

Xiaoyan Li,<sup>a</sup> Yuming Chen,<sup>a</sup> Haimin Yao,<sup>a</sup> Xiangyang Zhou,<sup>b</sup> Juan Yang,<sup>b</sup> Haitao Huang,<sup>c</sup> Yiu-Wing Mai<sup>ad</sup> and Limin Zhou<sup>a\*</sup>

<sup>a</sup> Department of Mechanical Engineering, The Hong Kong Polytechnic University, Hong Kong, China. Tel: 852-2766 6663; Fax: 852-2365 4703 E-mail: mmlmzhou@polyu.edu.hk.

<sup>b</sup> School of Metallurgy and Environment, Central South University, Changsha, Hunan, China.

<sup>c</sup> Department of Applied Physics and Materials Research Center, The Hong Kong Polytechnic University, Hong Kong, China.

<sup>d</sup> Centre for Advanced Materials Technology (CAMT), School of Aerospace, Mechanical and Mechatronics Engineering J07, The University of Sydney, NSW 2006, Australia.

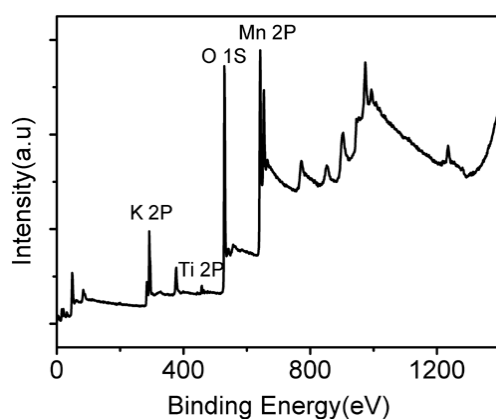

**Fig. S1** XPS fully scanned spectra of core-shell  $\text{TiO}_2\text{-MnO}_2/\text{MnO}_2$  heterostructures.

The peaks of O1s, Ti 2p, Mn 2p, Mn 3p3, K 2p are observed in Fig.S1, where a trace of K is introduced during the hydrothermal reaction,<sup>1, 2</sup> which is consistent with the observation of EDS (Fig. S3).

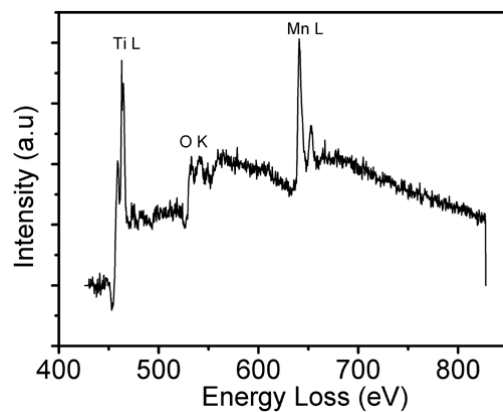

**Fig. S2** EELS spectra of core/shell  $\text{TiO}_2\text{-MnO}_2/\text{MnO}_2$  heterostructures.

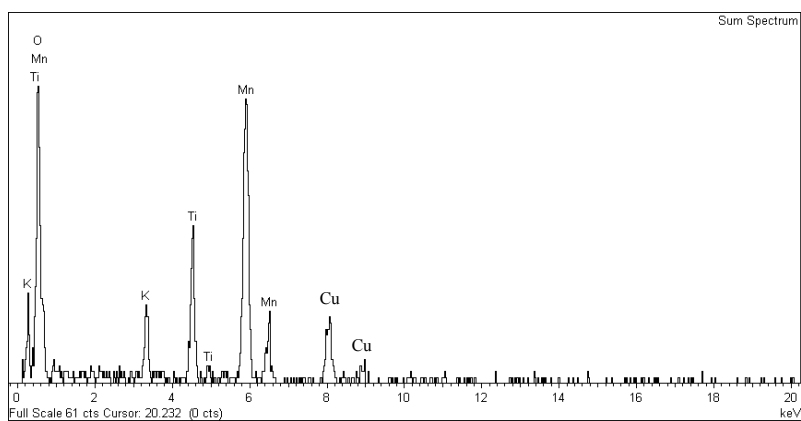

**Fig. S3** EDS spectrum of core/shell  $\text{TiO}_2\text{-MnO}_2/\text{MnO}_2$  heterostructures.

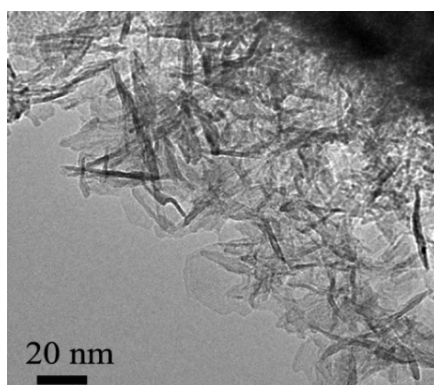

**Fig. S4** TEM image of core/shell  $\text{TiO}_2\text{-MnO}_2/\text{MnO}_2$  heterostructures.

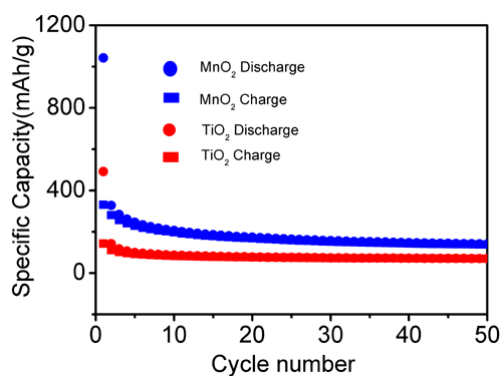

**Fig. S5** Cycle performance of TiO<sub>2</sub> and MnO<sub>2</sub> at 0.1 A g<sup>-1</sup>.

**Table S1** Weight and atomic concentrations of Mn and Ti elements in TiO<sub>2</sub>-MnO<sub>2</sub>/MnO<sub>2</sub> nanofibers.

|           | Mn    | Ti    |
|-----------|-------|-------|
| Weight /% | 71.65 | 28.35 |
| Atomic /% | 68.79 | 31.21 |

**Table S2** Comparison of the capacities for various MnO<sub>2</sub>-based electrodes

| Material                             | Capacity /Current      | Capacity/Current       | Cycling life | Ref.                                                          |
|--------------------------------------|------------------------|------------------------|--------------|---------------------------------------------------------------|
| This work                            | 888 mAh/g,<br>0.1 A/g  | 347 mAh/g,<br>1 A/g    | 500          |                                                               |
| TiO <sub>2</sub> -C/MnO <sub>2</sub> | -----                  | 332 mAh/g,<br>0.67 A/g | 150          | <i>Nano Lett.</i> <b>2013</b> , <i>13</i> ,<br>5467.          |
| MnO <sub>2</sub> /CNT                | 500 mAh/g,<br>0.05 A/g | -----                  | 16           | <i>Nano Lett.</i> , <b>2009</b> , <i>9</i> ,<br>1002.         |
| Graphene-MnO <sub>2</sub>            | 495 mAh/g,<br>0.1 A/g  | -----                  | 40           | <i>J. Phys. Chem. Lett.</i><br><b>2011</b> , <i>2</i> , 1855. |
| MnO <sub>2</sub> -C                  | 700 mAh/g,<br>0.1 A/g  | -----                  | 60           | <i>ACS Appl. Mater. Interfaces</i> 2012, <i>4</i> ,<br>2325.  |

## REFERENCES

- (1) W. M. Chen, L. Qie, Q. G. Shao, L. X. Yuan, W. X. Zhang and Y. H. Huang, *ACS Appl. Mater. Interface* 2012, **4**, 3047-3053.
- (2) X. D. Zhao, H. M. Fan, J. Luo, J. Ding, X. Y. Liu, B. S. Zou and Y. P. Feng, *Adv. Funct. Mater.* 2011, **21**, 184-190.
